# Supplementary material for: Effect of van der Waals interactions on the adhesion strength at the interface of the hydroxyapatite–titanium biocomposite: a first-principles study
Source: Royal Society of Chemistry journal article supplement (doi:10.1039/d0ra06006b), 2020-01-01
Supplement: d0ra06006b1.pdf [file d0ra06006b1.pdf]

## Effect of van der Waals Interactions on the Adhesion Strength at the Interface of the Hydroxyapatite–Titanium Biocomposite: A First-Principles Study

Irina Yu. Grubova,<sup>\*a</sup> Maria A. Surmeneva,<sup>a</sup> Roman A. Surmenev<sup>\*a</sup> and Erik C. Neyts<sup>b</sup>

<sup>a</sup> Research Center for Physical Materials Science and Composite Materials, Research School of Chemistry & Applied Biomedical Sciences, National Research Tomsk Polytechnic University, Lenin Avenue, 30, 634050 Tomsk, Russia

<sup>b</sup> Department of Chemistry, PLASMANT Research Group, NANOlaboratory Center of Excellence, University of Antwerp, Universiteitsplein 1, B-2610 Wilrijk-Antwerp, Belgium

\*Corresponding author: Tel.: +79039530969 (Tomsk)

E-mail address: [rsurmenev@gmail.com](mailto:rsurmenev@gmail.com) (R. Surmenev),

[rodeo\\_88@mail.ru](mailto:rodeo_88@mail.ru) (I. Grubova)

### Supplementary Information

#### S1. Computational Model

We used the classical ReaxFF force field for generating a series of reasonable amorphous structures, and for the subsequent rough scanning (single point calculations on a grid at 0K) of the interface interaction between a-HAP and the a-TiO<sub>2</sub> surfaces. In practice, this means that we generated several hundreds of interface structures, which were energetically analyzed. For the actual DFT calculations, we used those ReaxFF-created interfacial models as input that were the most stable.

Then, we explored the interfacial bonding mechanism of a-HAP surface onto a-TiO<sub>2</sub>. The obtained results revealed that the a-HAP / a-TiO<sub>2</sub> interface with two possible stacking positions (1\_a-TiO<sub>2</sub> and 2\_a-TiO<sub>2</sub>) has a more preferable interaction and it is thermodynamically more

stable than the other interfaces (Please see Table 3 of Ref. 1 a-HAP / a-TiO<sub>2</sub>(3) (1\_ a-TiO<sub>2</sub>(3) and 4\_ a-TiO<sub>2</sub>(3)).

Therefore, we used this interface model at two stacking positions as the initial structure for constructing the interfaces between the Si substituted a-HAP and a-TiO<sub>2</sub>.

We created 12 geometry structures for the interface for one stacking position through the substitution of one P atom by one Si atom in each of the six PO<sub>4</sub> groups in a-HAP (a-Si-HAP) with the creation of OH-vacancies as charge compensation (Figure S1).

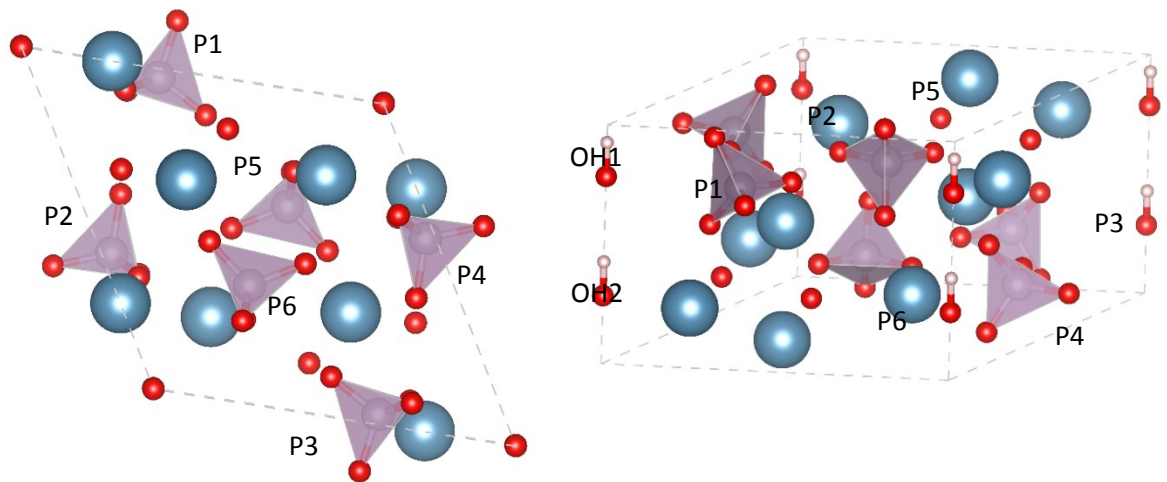

**Figure S1.** Schematic representation of the phase-pure HAP unit cell (Ca - blue, O - red, H - white, P - purple). The six phosphate atoms labelled P1-P6, and the two hydroxyl groups are OH1 and OH2.

The geometry of these partition boundaries was optimized in the VASP software package, after which the work of adhesion was calculated. The calculated  $W_{ad}$  of 24 geometries for a-Si-HAP / a-TiO<sub>2</sub> interface are listed in Table A1. The higher absolute value of the obtained  $W_{ad}$  is, the more stable the interfacial bonds. For the further calculation of the van der Waals forces, we have chosen the interface (the a-Si-HAP (P5, OH1) / 1\_a-TiO<sub>2</sub> and the a-Si-

HAP (P5, OH2) / 2\_a-TiO<sub>2</sub> interface at the initial stage), which gave us the best interaction at the interface (i.e., with higher  $W_{ad}$  value (Table S1)).

**Table S1.** Calculated Work of Adhesion for a-Si-HAP / a-TiO<sub>2</sub> interface as function of the substitution position.

| system               | $W_{ad}$<br>(J/m <sup>2</sup> ) |  | system               | $W_{ad}$<br>(J/m <sup>2</sup> ) |
|----------------------|---------------------------------|--|----------------------|---------------------------------|
| 1_a-TiO <sub>2</sub> |                                 |  | 2_a-TiO <sub>2</sub> |                                 |
| OH1                  |                                 |  | OH1                  |                                 |
| P1                   | -2.466                          |  | P1                   | -2.322                          |
| P2                   | -2.272                          |  | P2                   | -2.268                          |
| P3                   | -2.118                          |  | P3                   | -2.147                          |
| P4                   | -2.278                          |  | P4                   | -2.337                          |
| P5                   | -2.785                          |  | P5                   | -2.395                          |
| P6                   | -2.305                          |  | P6                   | -2.149                          |
| OH2                  |                                 |  | OH2                  |                                 |
| P1                   | -2.619                          |  | P1                   | -2.413                          |
| P2                   | -2.376                          |  | P2                   | -2.238                          |
| P3                   | -2.390                          |  | P3                   | -2.399                          |
| P4                   | -2.417                          |  | P4                   | -2.207                          |
| P5                   | -2.638                          |  | P5                   | -2.608                          |
| P6                   | -2.356                          |  | P6                   | -2.476                          |

A detailed description of the construction of the considered interfaces and the amorphization procedure can be found in our previous work.<sup>1,2</sup>

## References

- (1) Grubova, I. Y.; Surmeneva, M. A.; Huygh, S.; Surmenev, R. A.; Neyts, E. C. Density Functional Theory Study of Interface Interactions in Hydroxyapatite/Rutile Composites for Biomedical Applications. *J. Phys. Chem. C* **2017**, *121*, 15687–15695.

(2) Grubova, I. Y.; Surmeneva, M. A.; Huygh, S.; Surmenev, R. A.; Neyts, E. C. Effects of Silicon Doping on Strengthening Adhesion at the Interface of the Hydroxyapatite–Titanium Biocomposite: A First-Principles Study. *Comp. Mater. Sci.* **2019**, *159*, 228–234.
